# Supplementary material for: Engineering the heterogeneous photocatalytic activity of crystalline decatungstate-based coordination polymers
Source: Royal Society of Chemistry journal article supplement (doi:10.1039/d4ce00391h), 2024-01-01
Supplement: d4ce00391h1.pdf [file d4ce00391h1.pdf]

## Supporting Information

### Engineering the heterogeneous photocatalytic activity of crystalline decatungstate-based coordination polymers

Meiying Wang,<sup>a</sup> Chunbo Jia,<sup>a</sup> Hehua Hui,<sup>a</sup> Qianxiang Xu,<sup>a</sup> Xiang Li,<sup>a</sup> Yuanhang  
Ren,<sup>a</sup> Bin Yue<sup>\*a</sup> and Heyong He<sup>\*a</sup>

<sup>a</sup>Department of Chemistry and Shanghai Key Laboratory of Molecular Catalysis and  
Innovative Materials, Fudan University, Shanghai 200438, P. R. China. E-mail:  
[yuebin@fudan.edu.cn](mailto:yuebin@fudan.edu.cn), [heyonghe@fudan.edu.cn](mailto:heyonghe@fudan.edu.cn)

## EXPERIMENTAL SECTION

### Synthesis of tetrabutylammonium decapolytungstate (TBADT)

TBADT was synthesized according to a literature<sup>1</sup>. Sodium tungstate dihydrate (16 g, 48.5 mmol) was dissolved in 100 mL of deionized water and heated to boil under stirring. Another 8.4 mL of concentrated hydrochloric acid (12 mol·L<sup>-1</sup>, 100 mmol) was poured slowly into 25 mL of deionized water, heated and stirred until nearly boiling. The diluted hot hydrochloric acid solution was poured quickly into the sodium tungstate solution under vigorous stirring, and finally a bright yellow solution was obtained. After stirring for 3 min under near-boiling condition, a solution of tetrabutylammonium bromide (6.4 g, 19.8 mmol) dissolved in 10 mL of hot water was rapidly added, resulting in a large amount of light-yellow precipitate. After stirring for 5 min, the hot suspension was filtered immediately. The filter cake was washed with hot deionized water and ethanol in turn and then dried. Light yellow powder-like TBADT with a yield of about 89% (based on sodium tungstate dihydrate) was thus obtained.

### Synthesis of 2,5-bis(3-pyridyl)-1,3,4-oxadiazole (3-bpo) and 2,5-bis(4-pyridyl)-1,3,4-oxadiazole (4-bpo)

Hydrazine hydrochloride (4.90 g, 46.7 mmol), nicotinic acid (9.96 g, 80.9 mmol), and polyphosphoric acid (169 g, containing 85% P<sub>2</sub>O<sub>5</sub>) were added into a 250 mL flask. The mixture was then heated to 120 °C under stirring, and then slowly raised to 160°C and held for 5 hours. After the reaction, the mixture was cooled slightly and then neutralized with 20% NaOH aqueous solution in an ice-water bath until the pH reached 7. After restoring to room temperature and filtering, a pink crude product was obtained. The crude product was recrystallized with 95% ethanol to obtain light yellow needle-like crystals of 2,5-bis(3-pyridyl)-1,3,4-oxadiazole (3-bpo) with a yield of 44% (based on nicotinic acid).

Hydrazine hydrochloride (5.05 g, 48.1 mmol), isonicotinic acid (9.93 g, 80.7 mmol), and polyphosphoric acid (165 g, containing 80% P<sub>2</sub>O<sub>5</sub>) were added to a 250 mL flask. The mixture was then heated to 120 °C under stirring and then slowly raised to 160°C and held for 4 hours. After the reaction, the mixture was cooled slightly and then

neutralized with 20% NaOH aqueous solution in an ice-water bath until the pH reached 7. After restoring to room temperature and filtering, a white crude product was obtained. The crude product was recrystallized with 95% ethanol. to obtain white needle-like crystals of 2,5-bis(4-pyridyl)-1,3,4-oxadiazole (4-bpo) with a yield of 50% (based on nicotinic acid).

## Crystallographic data

**Table S1** Crystallographic data and structure refinement for compounds.

| Compound                                                          | 1                                                                                                             | 2                                                                                                             | 3                                                                                              | 4                                                                                 |
|-------------------------------------------------------------------|---------------------------------------------------------------------------------------------------------------|---------------------------------------------------------------------------------------------------------------|------------------------------------------------------------------------------------------------|-----------------------------------------------------------------------------------|
| Formula                                                           | C <sub>28</sub> H <sub>60</sub> Cu <sub>2</sub> N <sub>8</sub> O <sub>52</sub> S <sub>2</sub> W <sub>10</sub> | C <sub>32</sub> H <sub>40</sub> Cu <sub>2</sub> N <sub>8</sub> O <sub>38</sub> S <sub>4</sub> W <sub>10</sub> | C <sub>40</sub> H <sub>34</sub> Cu <sub>2</sub> N <sub>8</sub> O <sub>32</sub> W <sub>10</sub> | C <sub>48</sub> H <sub>71</sub> CuN <sub>7</sub> O <sub>35</sub> SW <sub>10</sub> |
| Formula weight                                                    | 3370.4                                                                                                        | 3238.4                                                                                                        | 3104.2                                                                                         | 3240.1                                                                            |
| Wavelength (Å)                                                    | 1.34138                                                                                                       | 1.34138                                                                                                       | 1.34138                                                                                        | 1.34138                                                                           |
| Crystal System                                                    | Monoclinic                                                                                                    | Monoclinic                                                                                                    | Orthorhombic                                                                                   | Monoclinic                                                                        |
| Space group                                                       | <i>P2<sub>1</sub>/n</i>                                                                                       | <i>P2<sub>1</sub>/c</i>                                                                                       | <i>Pbca</i>                                                                                    | <i>P2<sub>1</sub>/c</i>                                                           |
| <i>a</i> (Å)                                                      | 10.3627(6)                                                                                                    | 10.8085(4)                                                                                                    | 16.7303(8)                                                                                     | 15.4754(4)                                                                        |
| <i>b</i> (Å)                                                      | 18.5962(11)                                                                                                   | 16.8447(6)                                                                                                    | 17.5503(8)                                                                                     | 20.7480(6)                                                                        |
| <i>c</i> (Å)                                                      | 16.5939(10)                                                                                                   | 18.0408(7)                                                                                                    | 18.9281(9)                                                                                     | 22.0378(5)                                                                        |
| $\alpha$ (°)                                                      | 90                                                                                                            | 90                                                                                                            | 90                                                                                             | 90                                                                                |
| $\beta$ (°)                                                       | 106.222(2)                                                                                                    | 106.909(2)                                                                                                    | 90                                                                                             | 90.7830(10)                                                                       |
| $\gamma$ (°)                                                      | 90                                                                                                            | 90                                                                                                            | 90                                                                                             | 90                                                                                |
| <i>V</i> (Å <sup>3</sup> )                                        | 3070.4(3)                                                                                                     | 3142.6(2)                                                                                                     | 5557.7(5)                                                                                      | 7075.32(3)                                                                        |
| <i>Z</i>                                                          | 2                                                                                                             | 2                                                                                                             | 4                                                                                              | 4                                                                                 |
| Reflns collected                                                  | 29098                                                                                                         | 48744                                                                                                         | 76802                                                                                          | 127260                                                                            |
| GOF on <i>F</i> <sup>2</sup>                                      | 1.115                                                                                                         | 1.032                                                                                                         | 1.080                                                                                          | 1.143                                                                             |
| <i>R</i> <sub>1</sub> [ <i>I</i> > 2σ( <i>I</i> )] <sup>[a]</sup> | 0.0413                                                                                                        | 0.0396                                                                                                        | 0.0297                                                                                         | 0.0485                                                                            |
| <i>wR</i> <sub>2</sub> (all data) <sup>[b]</sup>                  | 0.1159                                                                                                        | 0.1164                                                                                                        | 0.0706                                                                                         | 0.1124                                                                            |

$$^{[a]}R_1 = \frac{\sum ||F_o| - |F_c||}{\sum |F_o|}$$

$$^{[b]}wR_2 = \frac{[\sum [w(F_o^2 - F_c^2)^2]]}{\sum w(F_o^2)^2}^{1/2}$$

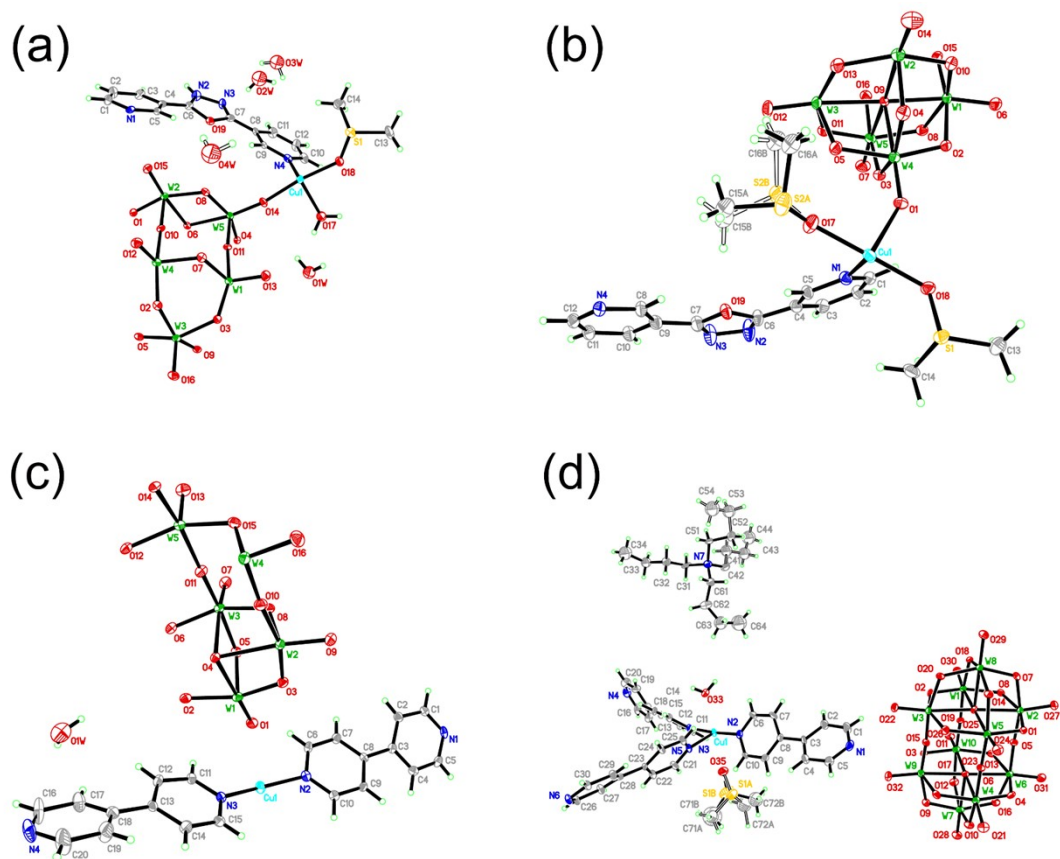

**Fig. S1.** Structural drawings of compounds 1-4 showing ADPs.

### Selected W-O<sub>t</sub> bond lengths and W-O<sub>b</sub>-W bond angles

**Table S2.** Bond lengths of W-O<sub>t</sub> and bond angles of W-O<sub>b</sub>-W in compounds 1-4.

|          | W1-O <sub>t</sub> | W2-O <sub>t</sub> | W3-O <sub>t</sub> | W4-O <sub>t</sub> | W5-O <sub>t</sub> | W2-O <sub>b</sub> -W4 | W3-O <sub>b</sub> -W5 |
|----------|-------------------|-------------------|-------------------|-------------------|-------------------|-----------------------|-----------------------|
|          | (Å)               | (Å)               | (Å)               | (Å)               | (Å)               | (°)                   | (°)                   |
| <b>1</b> | 1.723             | 1.694             | 1.726             | 1.692             | 1.708             | 176.7                 | 173.8                 |
| <b>2</b> | 1.753             | 1.768             | 1.676             | 1.708             | 1.730             | 176.1                 | 171.8                 |
| <b>3</b> | 1.710             | 1.686             | 1.689             | 1.695             | 1.698             | 175.5                 | 175.1                 |
| <b>4</b> | 1.719             | 1.684             | 1.704             | 1.720             | 1.730             | 177.0                 | 174.5                 |

## Bond valence sum analysis

To determine the oxidation state of Cu atoms, bond valence sum (BVS) analysis was conducted based on the bond lengths derived from SC-XRD. Sum of bond valence ( $N$ ) was calculated based on the equations below<sup>2</sup>.

$$N = \sum s_i \quad (1)$$

$$s_i = \exp\left[\frac{r_0 - r_i}{B}\right] \quad (2)$$

where  $s_i$  and  $r_i$  represent bond valence and bond length of each bond, respectively,  $r_0$  is an empirical data determined by experiments, and  $B$  is generally chosen as 0.37. For  $\text{Cu}^{2+}$ -O and  $\text{Cu}^{2+}$ -N bonds in compounds **1**, **2** and **4**, the reported  $r_0$  values are 1.679 Å and 1.719 Å<sup>3</sup>. For  $\text{Cu}^+$ -O and  $\text{Cu}^+$ -N bonds in compound **3**, the reported  $r_0$  values for  $\text{Cu}^{2+}$ -O and  $\text{Cu}^{2+}$ -N bonds are 1.593 Å<sup>4</sup> and 1.595 Å<sup>2</sup>, respectively. Calculated bond valence sums of compounds **1-4** are shown in **Table S3**.

**Table S3.** Bond valence sum of compounds **1-4**.

| Compound | Bond          | Bond length (Å) | Bond valence | BVS   |
|----------|---------------|-----------------|--------------|-------|
| <b>1</b> | Cu(1)-O(18)   | 1.980           | 0.443        | 2.109 |
|          | Cu(1)-O(14)   | 2.004           | 0.415        |       |
|          | Cu(1)-N(1)#1  | 2.008           | 0.458        |       |
|          | Cu(1)-N(4)    | 2.019           | 0.444        |       |
|          | Cu(1)-O(17)   | 2.245           | 0.217        |       |
|          | Cu(1)-O(15)#1 | 2.427           | 0.132        |       |
| <b>2</b> | Cu(1)-N(4)#2  | 2.007           | 0.459        | 2.097 |
|          | Cu(1)-O(17)   | 2.009           | 0.410        |       |
|          | Cu(1)-N(1)    | 2.014           | 0.451        |       |
|          | Cu(1)-O(18)   | 2.029           | 0.388        |       |
|          | Cu(1)-O(6)#3  | 2.262           | 0.207        |       |
|          | Cu(1)-O(1)    | 2.309           | 0.182        |       |

|          |              |        |         |       |
|----------|--------------|--------|---------|-------|
| <b>3</b> | Cu(1)-N(3)   | 1.963  | 0.370   | 0.973 |
|          | Cu(1)-N(2)   | 1.969  | 0.364   |       |
|          | Cu(1)-N(4)#4 | 2.250  | 0.170   |       |
|          | Cu(1)-O(1)   | 2.580  | 0.069   |       |
| <b>4</b> | Cu(1)-N(4)   | 1.9938 | 0.47557 | 2.035 |
|          | Cu(1)-N(3)#5 | 2.0153 | 0.43972 |       |
|          | Cu(1)-N(2)   | 2.0228 | 0.41997 |       |
|          | Cu(1)-N(5)   | 2.0405 | 0.44933 |       |
|          | Cu(1)-O(35)  | 2.4479 | 0.12513 |       |
|          | Cu(1)-O(36)  | 2.4488 | 0.1248  |       |

### Powder X-ray diffraction results

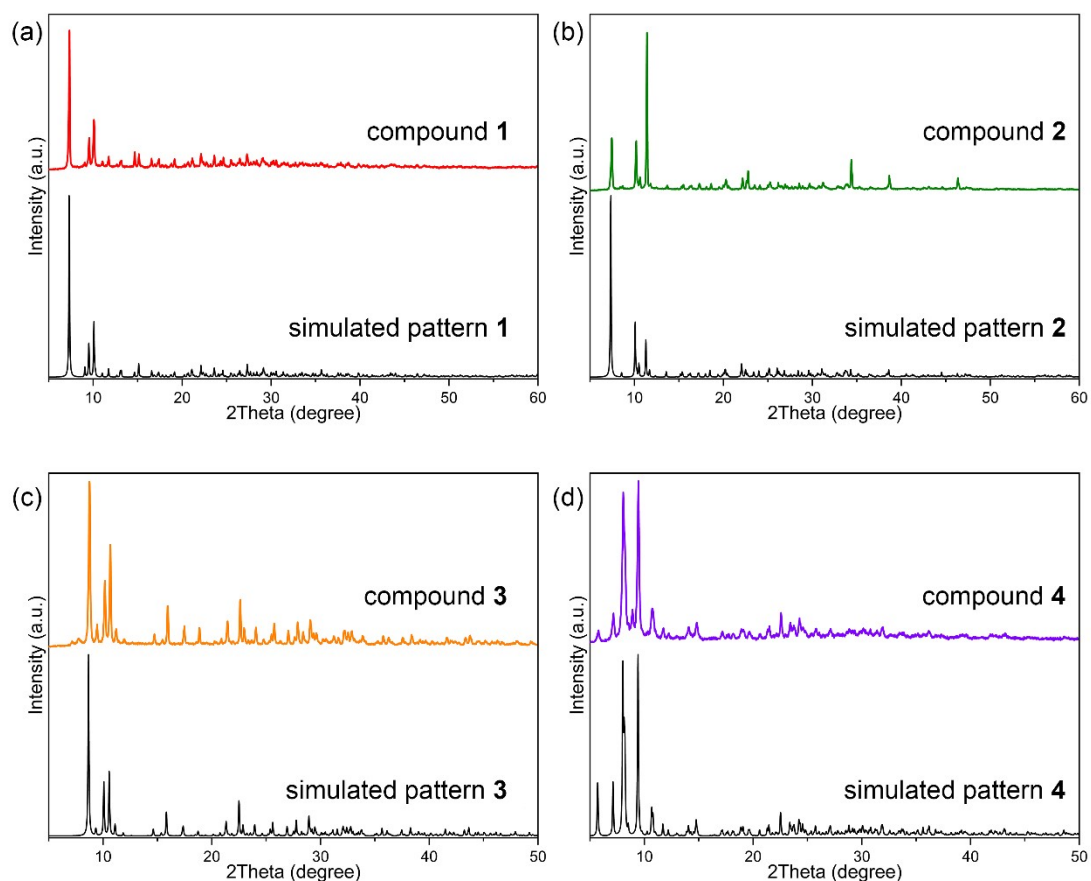

**Fig. S2.** PXRD patterns of compounds 1-4, compared with simulated results.

## N<sub>2</sub> adsorption results

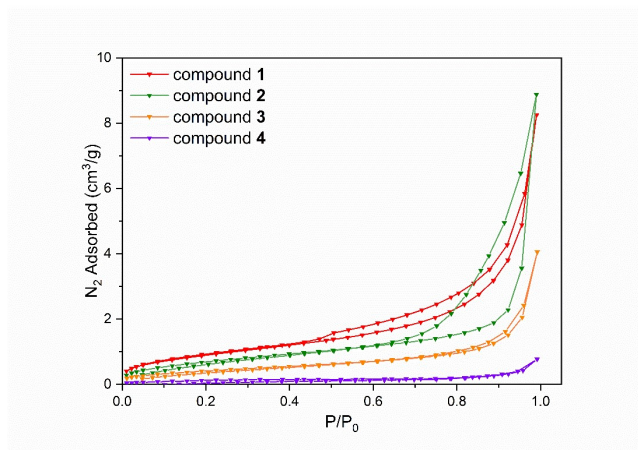

**Fig. S3.** N<sub>2</sub> Adsorption curves of compounds 1-4.

**Table S4.** Specific surface area and pore volume data of compounds 1-4.

| Compound                                                             | 1        | 2        | 3        | 4        |
|----------------------------------------------------------------------|----------|----------|----------|----------|
| BET Surface Area (m <sup>2</sup> /g)                                 | 3.4063   | 2.6924   | 1.5862   | 0.5125   |
| Langmuir Surface Area (m <sup>2</sup> /g)                            | 5.4302   | 4.3498   | 2.5410   | 0.8687   |
| BJH Adsorption cumulative volume <sup>[c]</sup> (cm <sup>3</sup> /g) | 0.012331 | 0.013319 | 0.006049 | 0.001072 |
| BJH Desorption cumulative volume <sup>[c]</sup> (cm <sup>3</sup> /g) | 0.012524 | 0.013515 | 0.006077 | 0.001125 |
| BJH Adsorption average pore width (Å)                                | 145.641  | 217.110  | 165.795  | 156.198  |
| BJH Desorption average pore width (Å)                                | 125.969  | 154.702  | 148.981  | 149.056  |

<sup>[c]</sup>Cumulative volume of pores between 17.000 Å and 3,000.000 Å width.

## Photodegradation Results

(a)

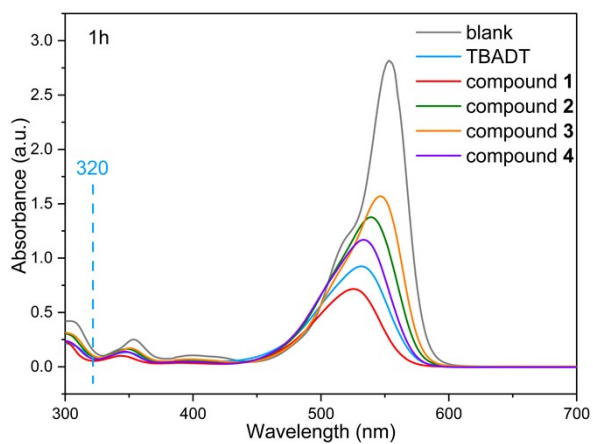

(b)

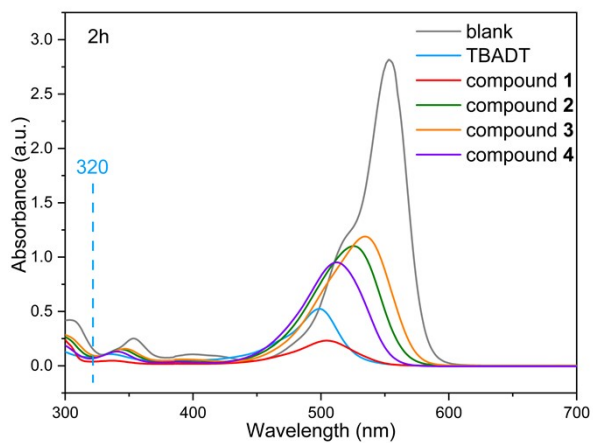

(c)

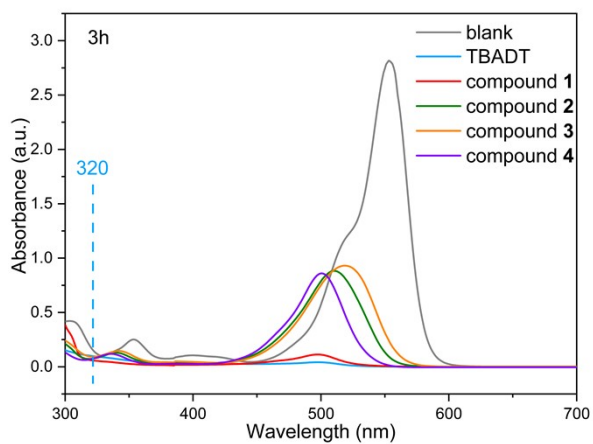



(d)

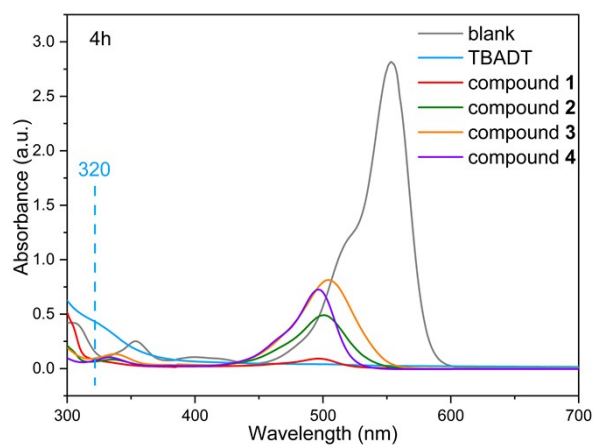

(e)

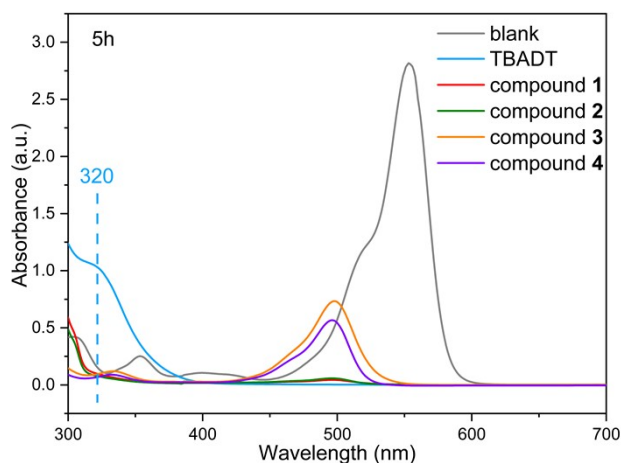

**Fig. S4.** UV-Vis DRS results of the solution after the photocatalytic degradation of RhB for 1-5 h.

## References

1. A. Chemseddine, C. Sanchez, J. Livage, J. P. Launay and M. Fournier, *Inorg. Chem.*, 1984, **23**, 2609-2613.
2. H. H. Thorp, *Inorg. Chem.*, 1992, **31**, 1585-1588.
3. J. P. Naskar, B. Guhathakurta, L. Lu and M. Zhu, *Polyhedron*, 2012, **43**, 89-96.
4. N. E. Brese and M. Okeeffe, *Acta Crystallogr. Sect. B: Struct. Sci.*, 1991, **47**, 192-197.
